# Supplementary material
Source: PubMed Central journal article supplement (PMC10482158)
Supplement: NIHMS1922371-supplement-ci-2020-00179m_SI.pdf [file NIHMS1922371-supplement-ci-2020-00179m_SI.pdf]

**Fast Identification of Possible Drug Treatment of Coronavirus Disease -19 (COVID-19)  
Through Computational Drug Repurposing Study**

**(Supporting Information)**

Junmei Wang\*

Department of Pharmaceutical Sciences and Computational Chemical Genomics Screening  
Center, School of Pharmacy, University of Pittsburgh, Pittsburgh, PA 15261, USA.

Corresponding author: Junmei Wang, [junmei.wang@pitt.edu](mailto:junmei.wang@pitt.edu)

\*To whom correspondence should be addressed

**Table S1. List of Glide docking scores and MM-PBSA-WSAS binding free energies for potential inhibitors binding to SARS-Cov-2 main protease (in kcal/mol). The net charge (NC) of charged molecules is shown in the parentheses.**

| Compound Name             | Docking Score | $\Delta E_{EEL}$ | $\Delta E_{VDW}$ | $\Delta G_{PB}$ | $\Delta G_{SA}$ | $\Delta TS$  | $\Delta G_{bind}$ |
|---------------------------|---------------|------------------|------------------|-----------------|-----------------|--------------|-------------------|
| DB01601<br>Docking Pose 2 | -9.4          | -51.6 ± 0.2      | -18.2 ± 0.30     | 47.37 ± 0.2     | -4.8 ± 0.0      | -23.4 ± 0.06 | -3.76 ± 0.2       |
| 10011418                  | -8.9          | -46.9 ± 0.4      | -69.7 ± 0.7      | 95.6 ± 0.7      | -4.8 ± 0.0      | -22.7 ± 0.1  | -3.0 ± 0.3        |
| 6102717                   | -10.0         | -47.2 ± 0.2      | -22.4 ± 0.5      | 51.6 ± 0.6      | -4.3 ± 0.0      | -22.8 ± 0.1  | 0.4 ± 0.3         |
| DB00183                   | -10.4         | -43.3 ± 0.2      | -27.4 ± 0.6      | 54.7 ± 1.2      | -4.4 ± 0.0      | -21.6 ± 0.1  | 1.3 ± 0.6         |
| DB01072                   | -9.1          | -46.8 ± 0.2      | -16.8 ± 0.5      | 47.3 ± 0.5      | -4.7 ± 0.0      | -22.8 ± 0.2  | 1.8 ± 0.6         |
| DB01204                   | -10.1         | -51.1 ± 0.2      | -31.2 ± 0.2      | 58.5 ± 0.6      | -4.1 ± 0.0      | -23.4 ± 0.0  | -4.5 ± 0.4        |
| DB01232                   | -9.0          | -44.2 ± 0.4      | -8.6 ± 0.4       | 34.7 ± 0.4      | -4.4 ± 0.0      | -21.0 ± 0.1  | -1.4 ± 0.3        |
| DB01264                   | -9.9          | -37.2 ± 0.1      | -31.2 ± 0.6      | 47.8 ± 0.6      | -2.9 ± 0.0      | -20.3 ± 0.1  | -3.2 ± 0.2        |
| DB01282                   | -8.7          | -49.1 ± 0.5      | -66.5 ± 0.4      | 91.8 ± 0.2      | -4.4 ± 0.0      | -23.8 ± 0.0  | -4.5 ± 0.3        |
| DB01328 (NC = 0)          | -8.5          | -37.2 ± 0.1      | -23.9 ± 0.7      | 49.5 ± 0.6      | -3.2 ± 0.0      | -19.8 ± 0.1  | 5.0 ± 0.1         |
| DB01328 (NC = -2)         | -6.1          | -44.8 ± 0.3      | 115.0 ± 0.8      | -80.8 ± 0.7     | -3.7 ± 0.0      | -21.9 ± 0.1  | 7.5 ± 0.8         |
| DB01698                   | -8.6          | -48.4 ± 0.2      | -46.0 ± 0.4      | 73.7 ± 0.4      | -3.9 ± 0.0      | -22.7 ± 0.1  | -1.9 ± 0.8        |
| DB03141 (NC = 0)          | -9.8          | -53.0 ± 0.3      | -27.4 ± 0.4      | 62.8 ± 0.3      | -4.6 ± 0.0      | -22.4 ± 0.0  | 0.2 ± 0.2         |
| DB03247 (NC = -2)         | -7.4          | -47.6 ± 0.5      | 74.0 ± 1.9       | -39.5 ± 2.0     | -3.6 ± 0.0      | -21.8 ± 0.1  | 4.9 ± 0.3         |
| DB03310 (NC = 0)          | -8.7          | -54.4 ± 0.4      | -76.0 ± 0.9      | 107.8 ± 1.0     | -4.2 ± 0.0      | -26.1 ± 0.0  | -0.8 ± 0.3        |
| DB03310 (NC = -2)         | -6.9          | -39.5 ± 0.2      | 45.9 ± 2.6       | -20.9 ± 2.8     | -3.3 ± 0.0      | -21.8 ± 0.0  | 4.0 ± 0.3         |
| DB06441 (NC = -4)         | -6.9          | -52.5 ± 0.4      | 194.4 ± 2.8      | -141.3 ± 2.1    | -4.3 ± 0.0      | -24.4 ± 0.0  | 20.7 ± 0.8        |
| DB06717 (NC = -2)         | -8.5          | -34.8 ± 0.7      | 177.4 ± 4.9      | -136.8 ± 2.2    | -3.4 ± 0.0      | -21.1 ± 0.1  | 23.4 ± 2.1        |
| DB08818 (NC = 0)          | -9.1          | -44.1 ± 0.3      | -80.2 ± 0.3      | 105.4 ± 0.5     | -4.6 ± 0.0      | -23.8 ± 0.1  | 0.4 ± 0.4         |
| DB08818 (NC = -2)         | -9.3          | -44.9 ± 0.1      | 75.9 ± 1.5       | -49.2 ± 1.3     | -4.3 ± 0.0      | -22.8 ± 0.0  | 0.4 ± 0.6         |
| DB09059                   | -9.0          | -61.3 ± 0.2      | -33.8 ± 0.7      | 75.1 ± 0.8      | -5.0 ± 0.0      | -25.8 ± 0.1  | 0.8 ± 0.6         |
| DB09065                   | -9.0          | -58.2 ± 0.1      | -14.3 ± 0.1      | 48.2 ± 0.4      | -5.3 ± 0.0      | -25.4 ± 0.1  | -4.1 ± 0.3        |
| DB11602                   | -8.9          | -52.6 ± 0.4      | -33.1 ± 0.4      | 73.0 ± 0.2      | -5.1 ± 0.0      | -24.7 ± 0.1  | 7.0 ± 0.2         |
| DB13074                   | -9.2          | -40.0 ± 0.3      | -22.7 ± 0.8      | 45.2 ± 0.4      | -3.3 ± 0.0      | -20.0 ± 0.1  | -0.7 ± 0.1        |
